# Supplementary material for: LEAP-2 Counteracts Ghrelin-Induced Food Intake in a Nutrient, Growth Hormone and Age Independent Manner
Source: MDPI journal article supplement (doi:10.3390/cells11030324), 2022-01-19
Supplement: s1 [file s1]

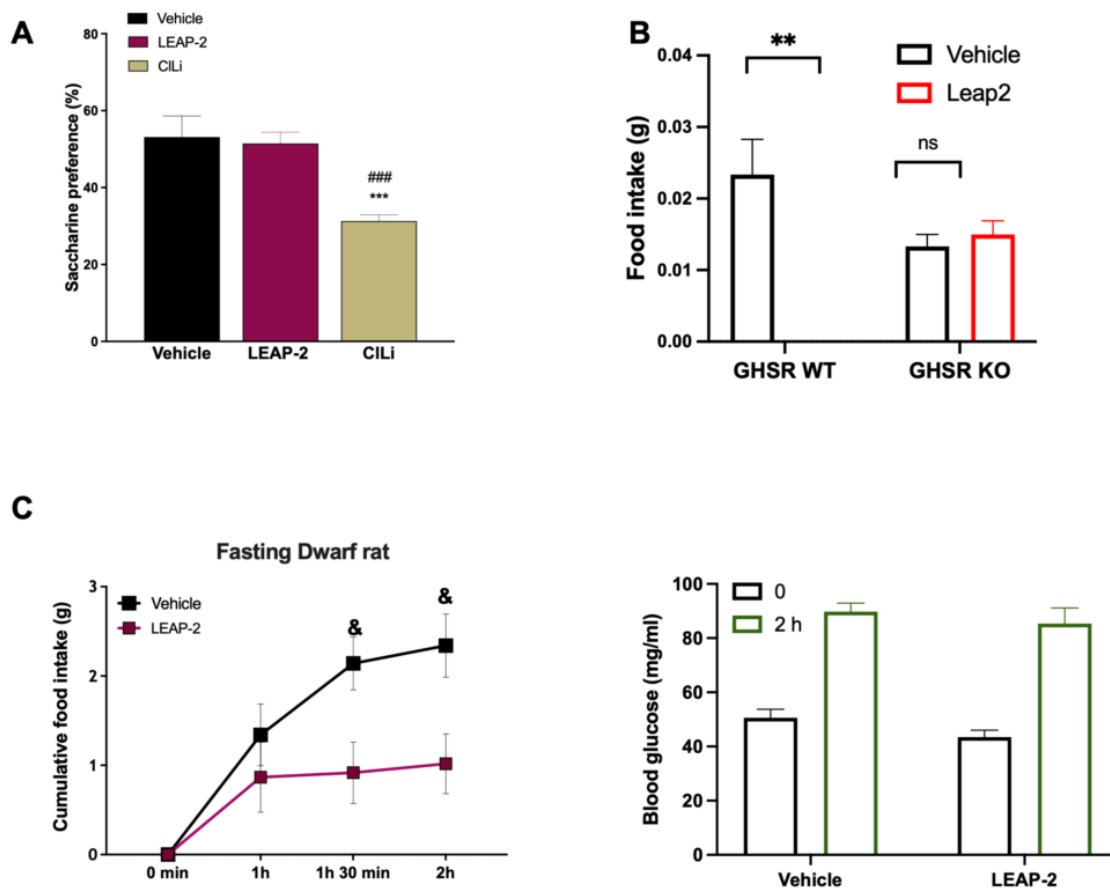

**Figure S1.** LEAP-2 does not produce toxic effects and food intake action is mediated via the GHS-R1a. (A) Conditional aversion test in mice treated with LEAP-2 (1.5 nmol/mice) or vehicle ICV.  $n = 8$ . (B) Food intake 2 hours after LEAP-2 administration in GHSR KO and wt mice.  $n = 9$ . (C) Food intake after LEAP-2 administration in dwarf rats fasting overnight (left panel) and Glucose levels before and after 2 h of LEAP-2 administration (right panel).  $n = 6$ . Data is expressed as mean  $\pm$  SEM.  $** p < 0.01$ ,  $*** p < 0.001$  between vehicle and LEAP-2.  $### p < 0.001$ ,  $\& p < 0.05$  between vehicle and CILi.
